# Supplementary material
Source: PubMed Central journal article supplement (PMC4851733)

Figure S1

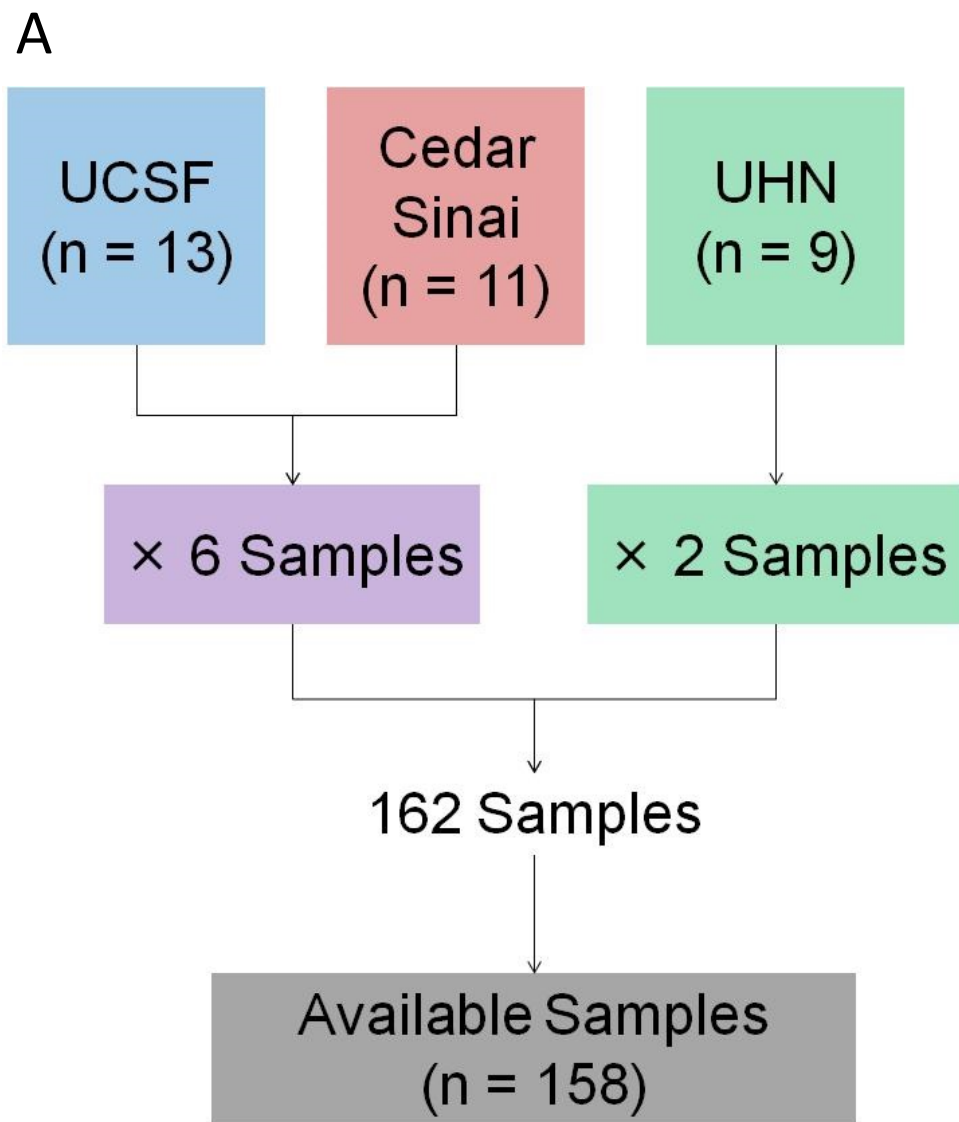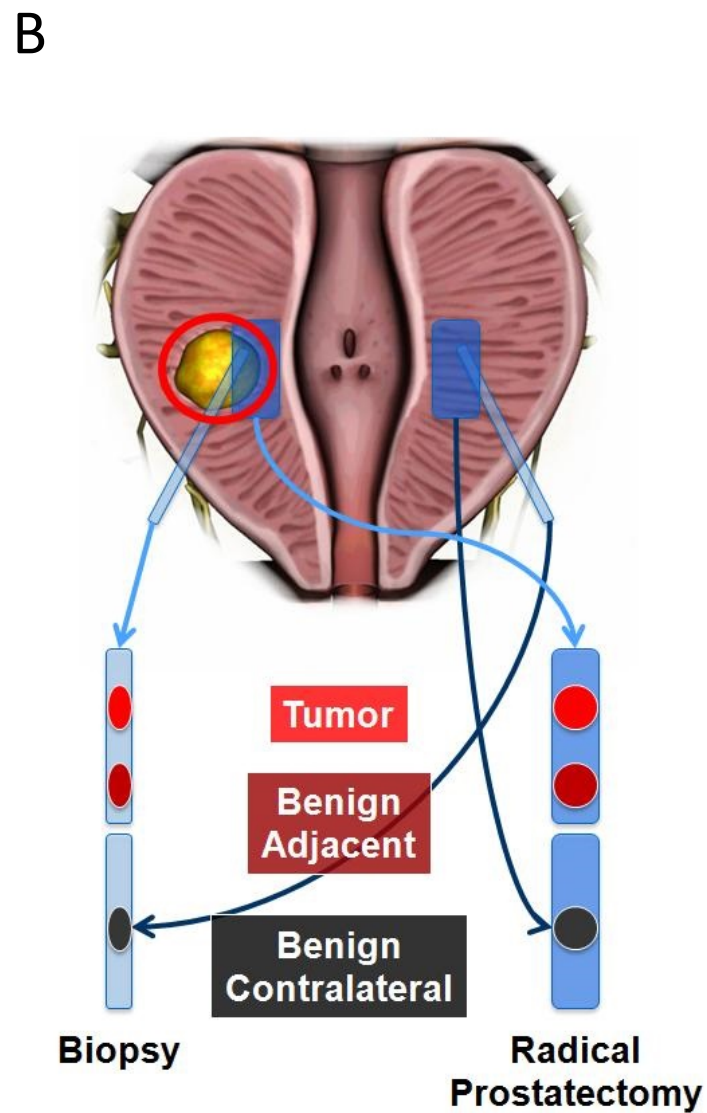

Supplement: mmc1.pdf [file mmc1.pdf]

Figure S2

Patient 18

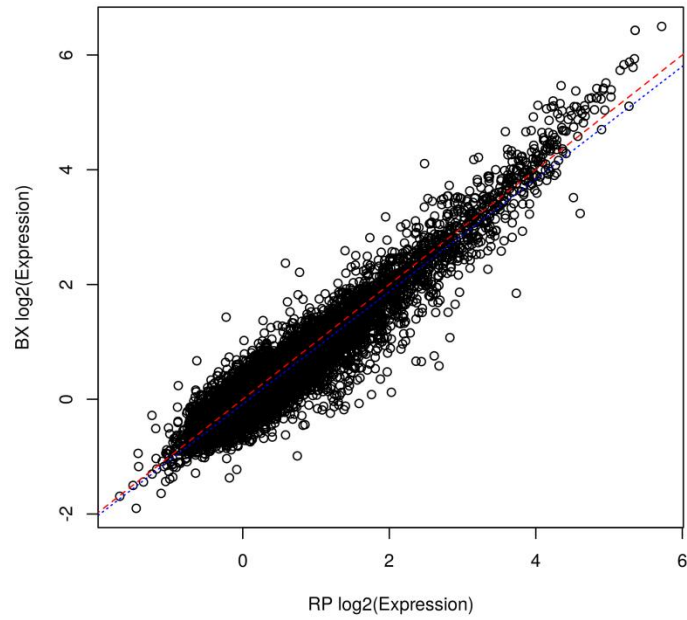

Patient 26

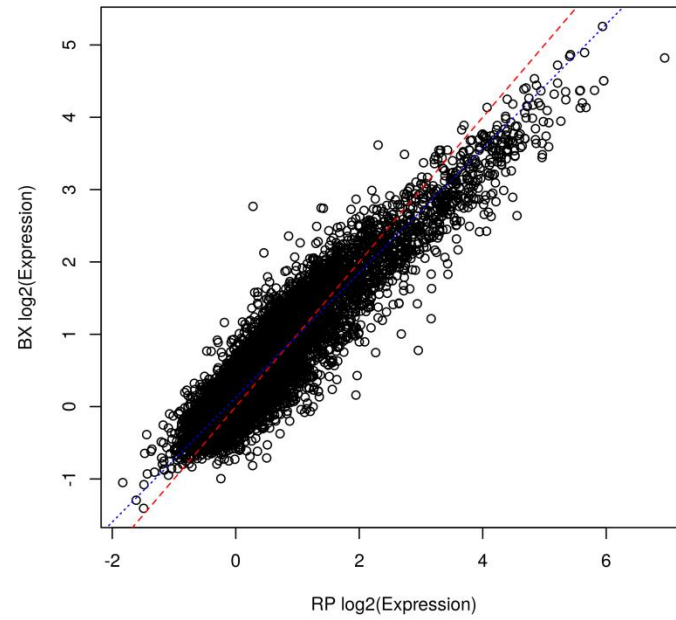

Patient 8

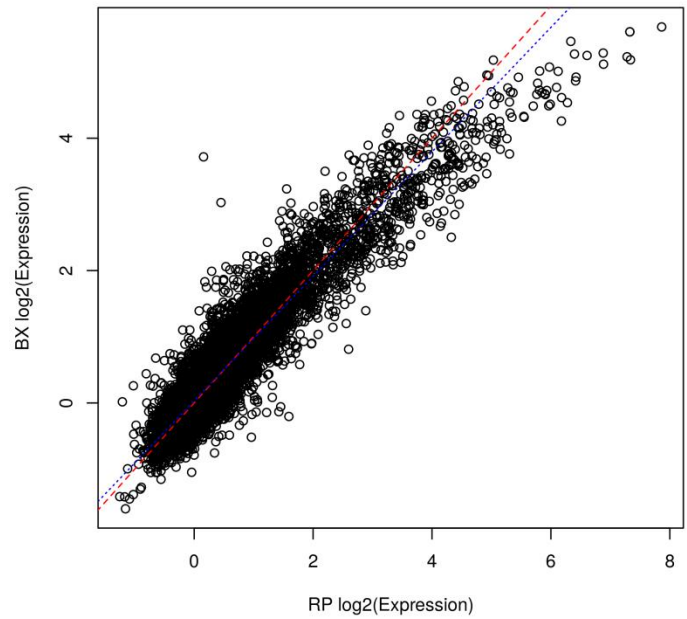

Patient 5

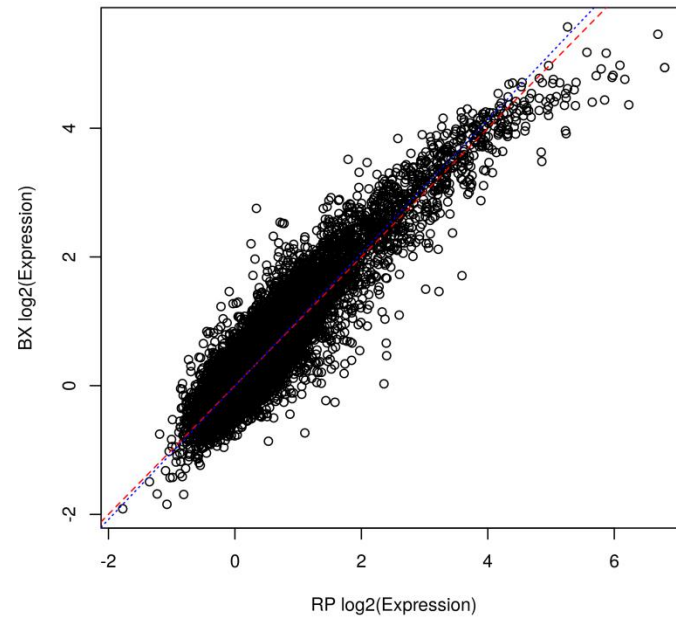

Supplement: mmc2.pdf [file mmc2.pdf]

Figure S3

Patient 16

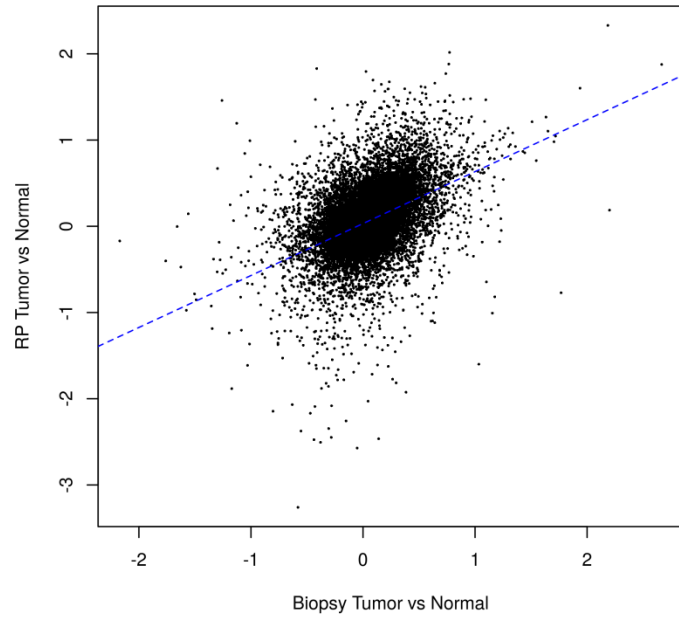

Patient 7

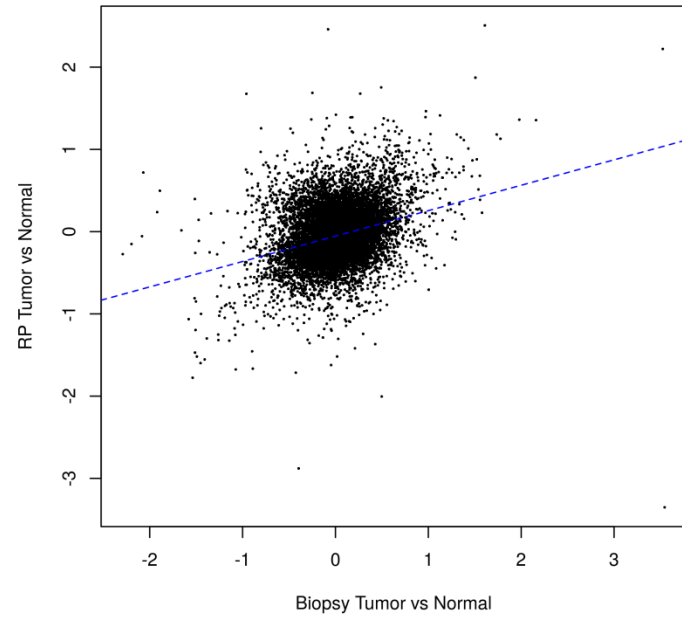

Patient 21

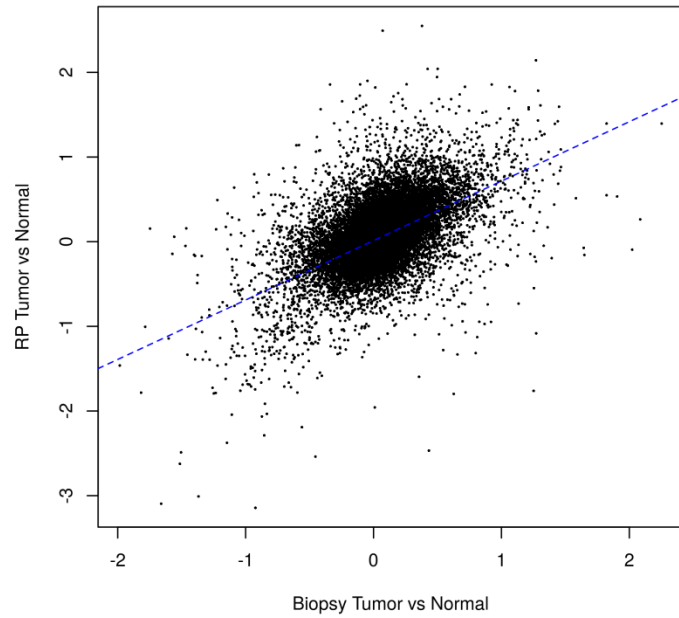

Patient 20

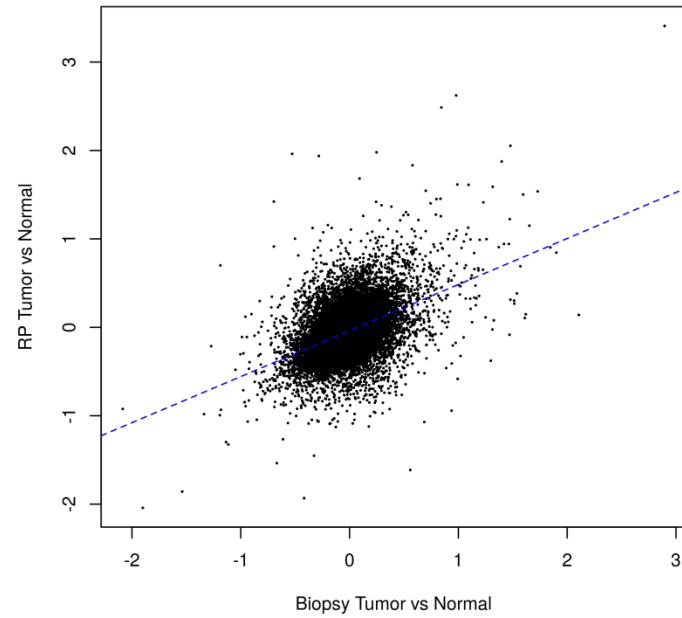

Supplement: mmc3.pdf [file mmc3.pdf]

Figure S4

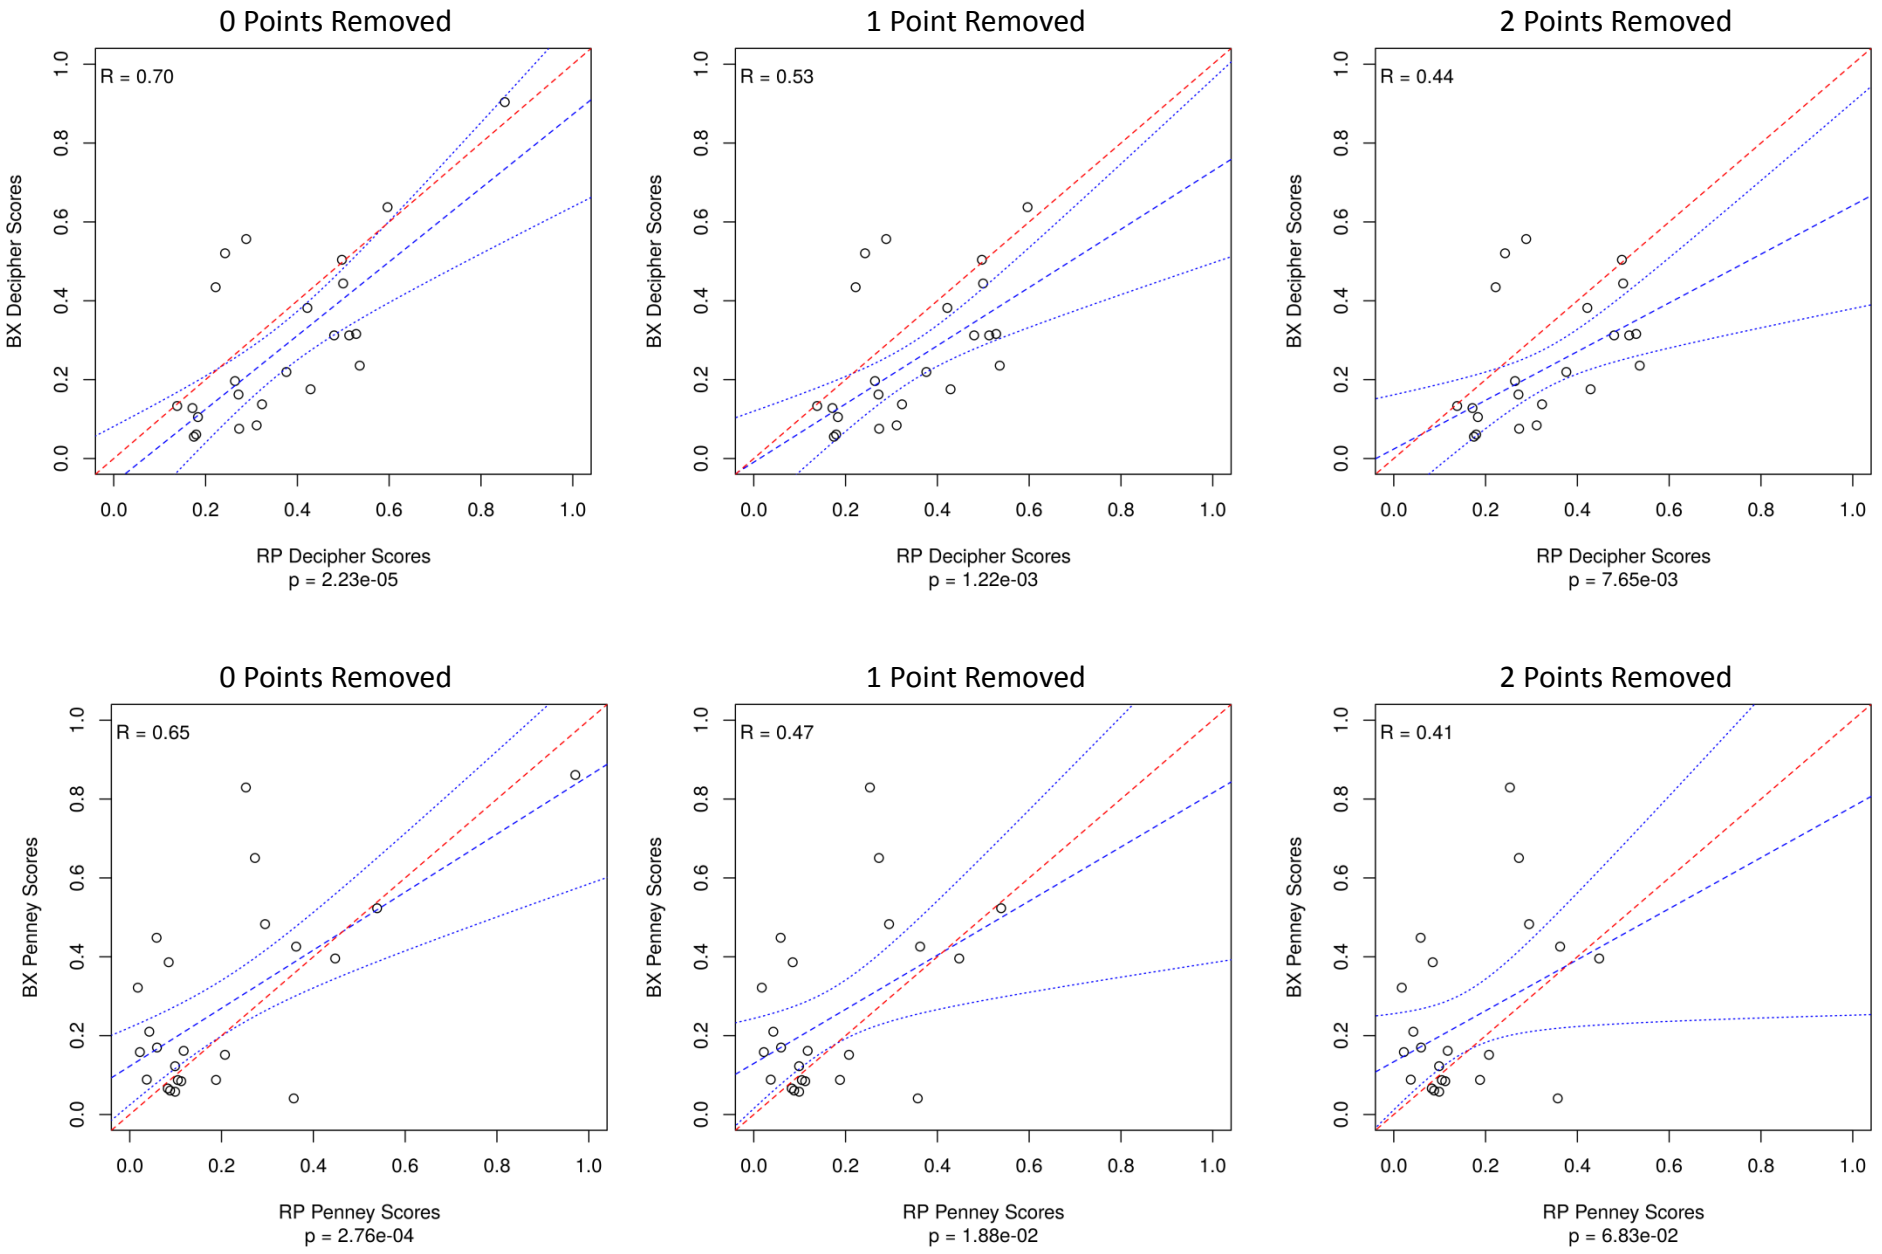

Supplement: mmc4.pdf [file mmc4.pdf]

Figure S5

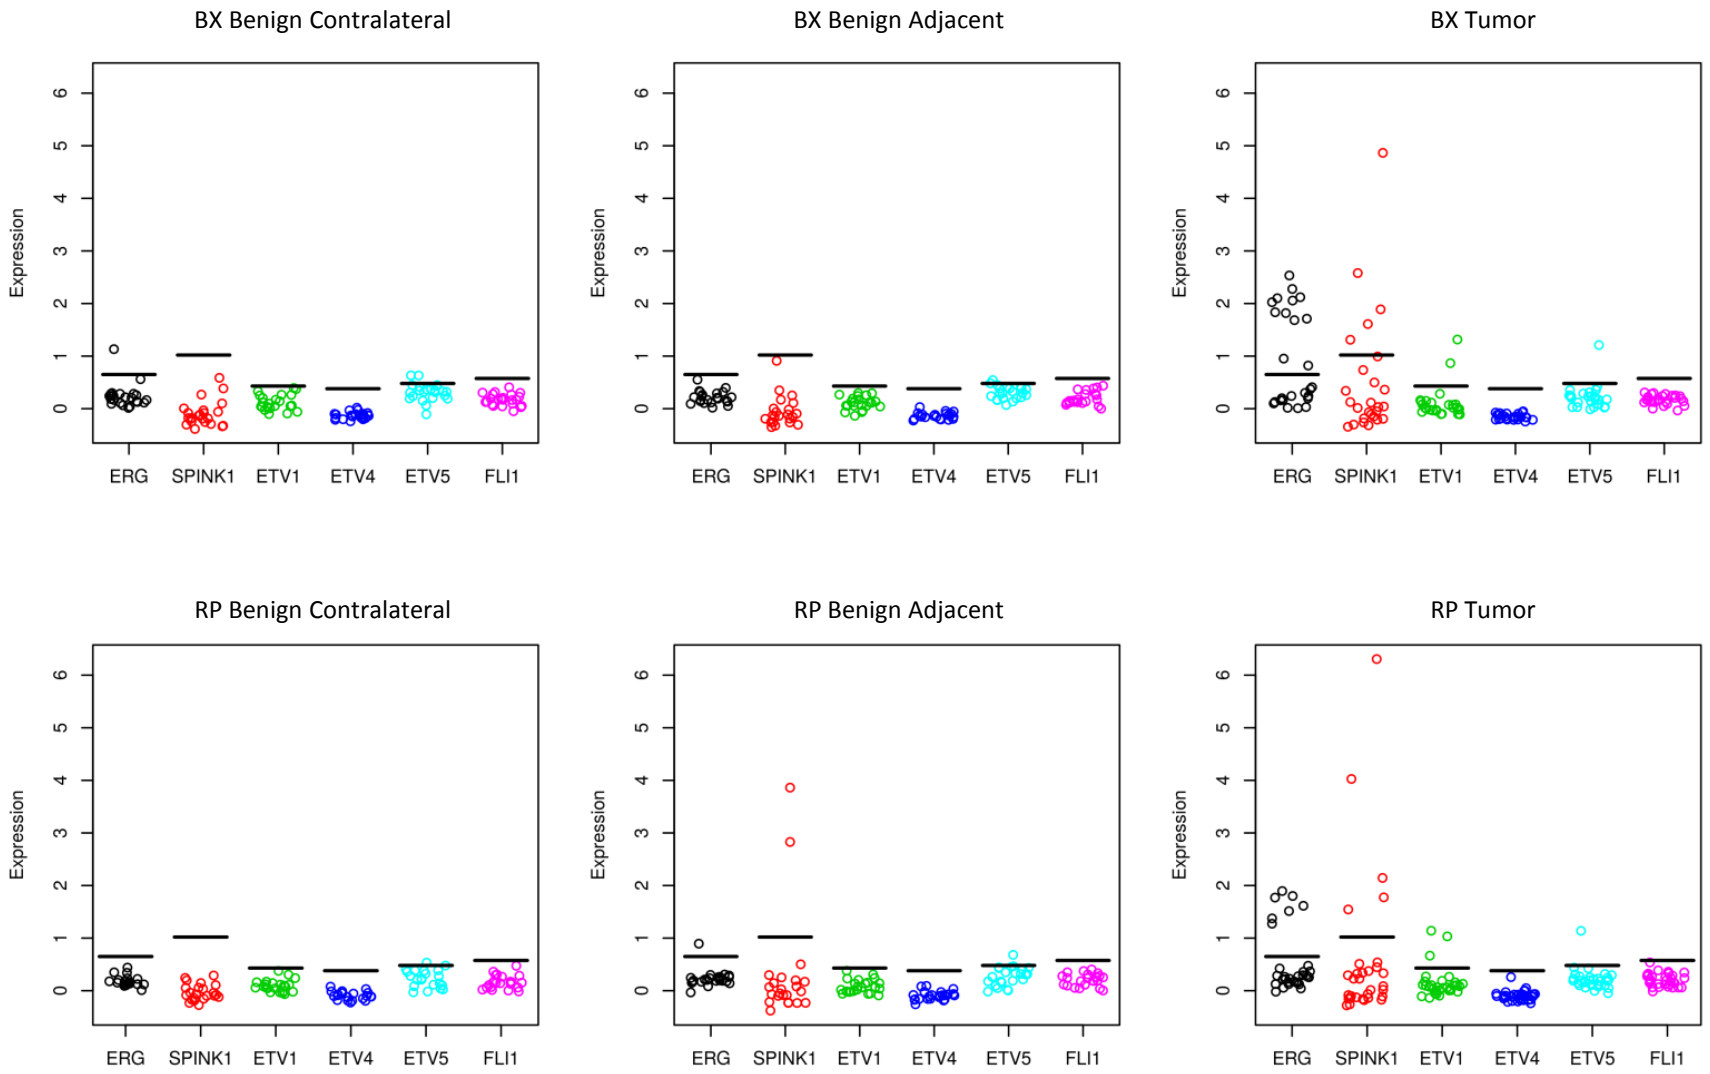

Supplement: mmc5.pdf [file mmc5.pdf]

Figure S6

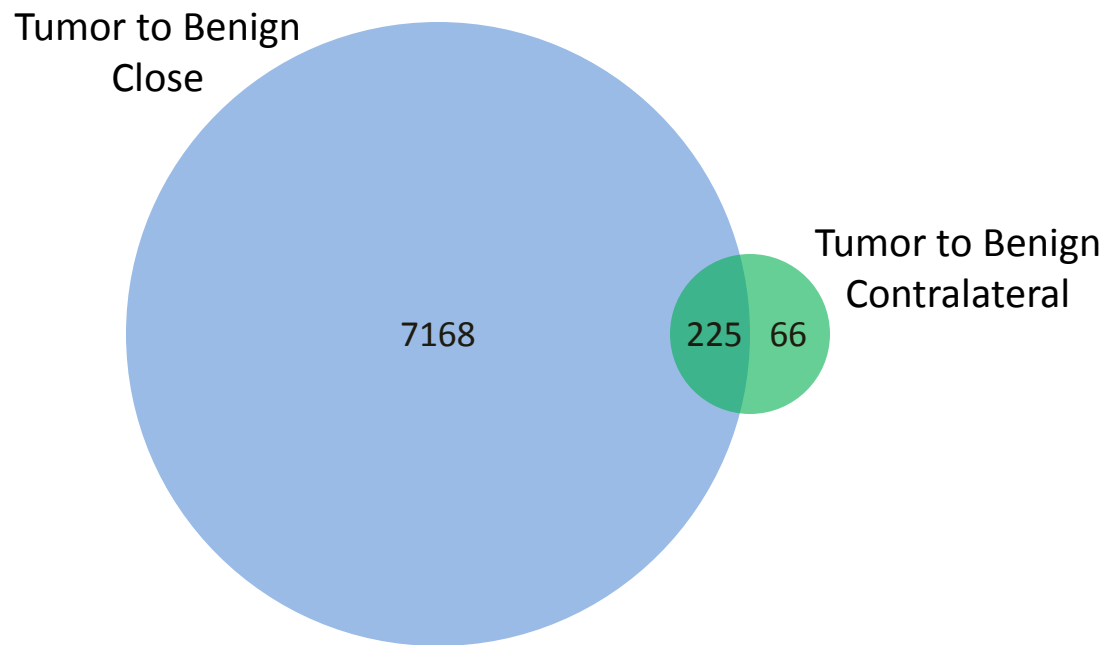

Supplement: mmc6.pdf [file mmc6.pdf]

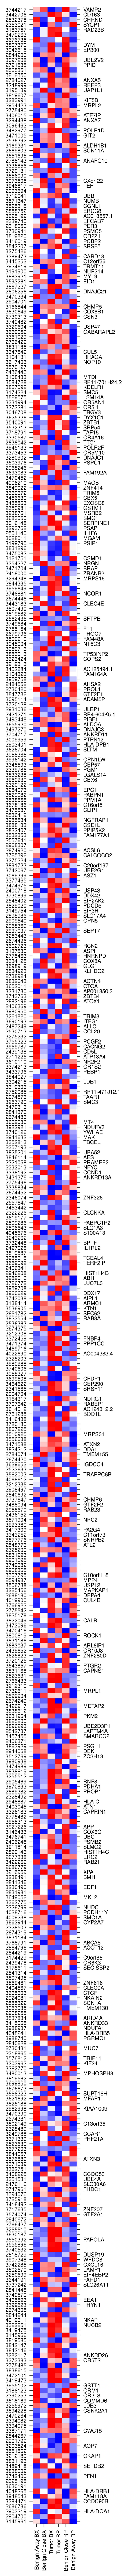

Supplement: mmc7.pdf [file mmc7.pdf]
